# Supplementary material
Source: Springer Nature journal article supplement (https://www.springermedizin.de/resource/supplementary/12936_2010_1399_MOESM6_ESM.pdf/9549702)

average number of *P. falciparum* antigens  
for which people were seropositive

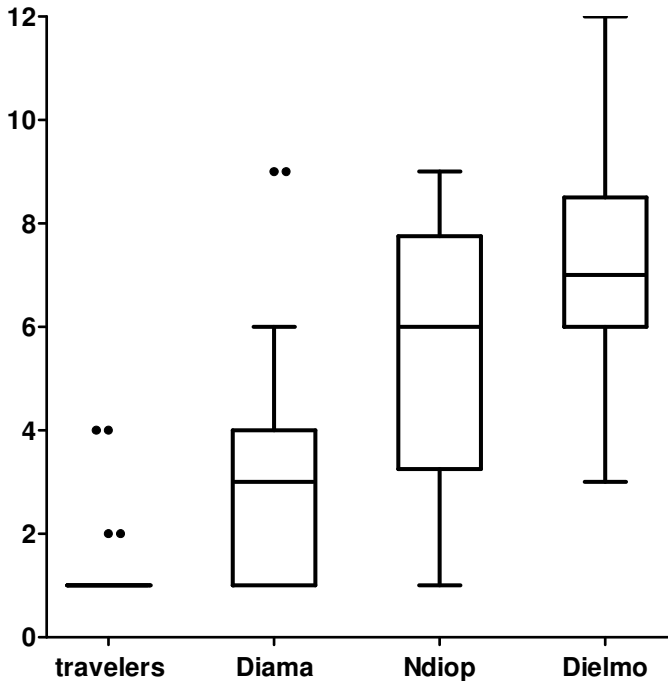

Supplement: MOESM6 [file 9549702]
